# Supplementary material for: Shotgun Bisulfite Sequencing of the Betula platyphylla Genome Reveals the Tree’s DNA Methylation Patterning
Source: MDPI journal article supplement (doi:10.3390/ijms151222874), 2014-12-10
Supplement: s1 [file s1]

## Supplementary Information

**Figure S1.** Correlation between the frequency of C sites and the length of a gene. The *x*-axis indicates the frequencies of C sites, and the *y*-axis indicates the length of the gene. (A) The distribution of the frequencies of mC sites; (B) The distribution of the frequencies of the whole genome C sites.

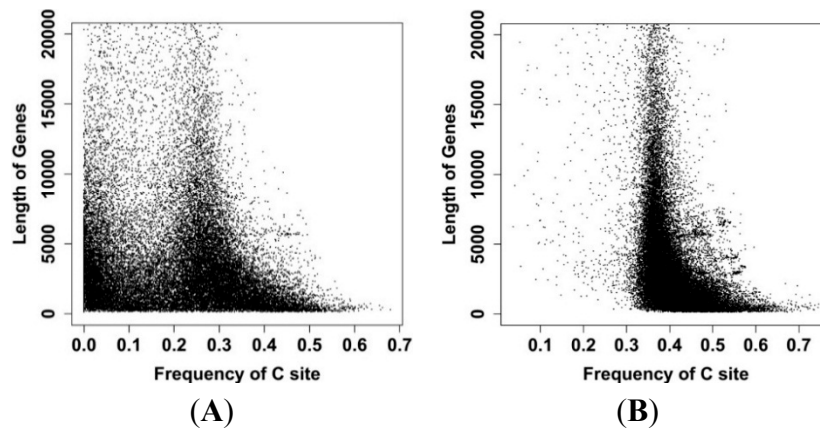

**Figure S2.** Methylation level analysis on gene bodies and their up- and down-stream sequences. All coding genes were divided into seven transcription elements, and the methylation level was analyzed over these regions. The vertical green lines indicate transcription start site (TSS).

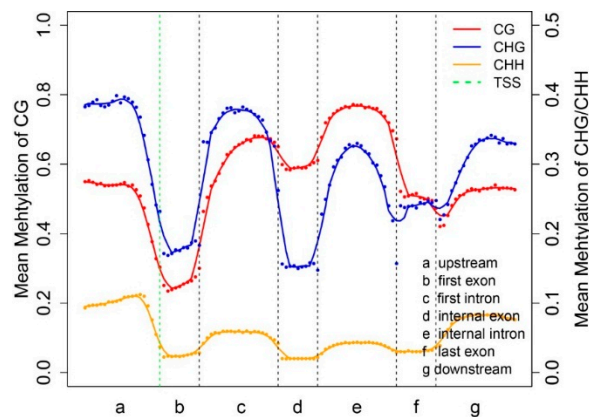

**Figure S3.** Correlation analysis between the two transcriptomes. The *x*-axis indicates the expression values for one transcriptome, and the *y*-axis indicates the expression values for the other transcriptome. All the values were log<sub>2</sub> transformed.

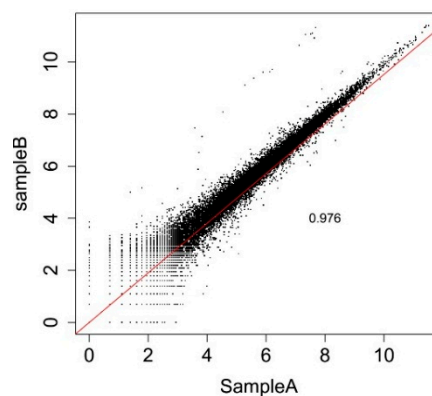

**Table S1.** Quality controls of mRNA transcriptome data.

| <b>Samples</b> | <b>Total Raw Reads</b> | <b>Total Clean Reads</b> | <b>Total Clean Nucleotides</b> | <b>Q20 Percentage</b> | <b>GC Percentage</b> |
|----------------|------------------------|--------------------------|--------------------------------|-----------------------|----------------------|
| Birch_xylem_A  | 27,278,632             | 25,647,400               | 2,308,266,000                  | 98.26%                | 45.75%               |
| Birch_xylem_B  | 28,703,868             | 26,811,962               | 2,413,076,580                  | 98.17%                | 45.91%               |

Q20 percentage: Percentage of the bases that the quality was not lower than 20 after filtration. GC percentage: Percentage of G and C bases account for total bases.
